# Supplementary material for: Patient safety skills in primary care: a national survey of GP educators
Source: Springer Nature journal article supplement (doi:10.1186/s12875-014-0206-5), 2014-12-01
Supplement: MOESM1 [file 9737544]

## SAFETY SKILLS SURVEY

*Safety Skills* are attributes that competent clinicians possess and that allow safe delivery of care. We are trying to understand what components make up these *Safety Skills*.

For each of the skills/attributes listed below, please rate on a scale of 1 (least) to 5 (most):

- a. How important and relevant is this skill/ attribute to being a safe GP?
- b. How trainable is this skill/ attribute?

| SKILL                                                                     | Importance / Relevance to GP |   |   |   |      | Trainable |   |   |   |      |
|---------------------------------------------------------------------------|------------------------------|---|---|---|------|-----------|---|---|---|------|
|                                                                           | Least                        |   |   |   | Most | Least     |   |   |   | Most |
| 1. Error awareness – recognising error-prone situations                   | 1                            | 2 | 3 | 4 | 5    | 1         | 2 | 3 | 4 | 5    |
| 2. Self awareness – recognising one’s own mental and physical limitations | 1                            | 2 | 3 | 4 | 5    | 1         | 2 | 3 | 4 | 5    |
| 3. Awareness of the role of the team and its contribution                 | 1                            | 2 | 3 | 4 | 5    | 1         | 2 | 3 | 4 | 5    |
| 4. Reflective thinking                                                    | 1                            | 2 | 3 | 4 | 5    | 1         | 2 | 3 | 4 | 5    |
| 5. The ability to think clearly in a crisis                               | 1                            | 2 | 3 | 4 | 5    | 1         | 2 | 3 | 4 | 5    |
| 6. Disease pattern recognition & vigilance for deviation from patterns    | 1                            | 2 | 3 | 4 | 5    | 1         | 2 | 3 | 4 | 5    |
| 7. Thinking & problem solving                                             | 1                            | 2 | 3 | 4 | 5    | 1         | 2 | 3 | 4 | 5    |
| 8. Anticipation of organisational problems                                | 1                            | 2 | 3 | 4 | 5    | 1         | 2 | 3 | 4 | 5    |
| 9. Honesty                                                                | 1                            | 2 | 3 | 4 | 5    | 1         | 2 | 3 | 4 | 5    |
| 10. Taking feedback constructively                                        | 1                            | 2 | 3 | 4 | 5    | 1         | 2 | 3 | 4 | 5    |
| 11. Decision-making                                                       | 1                            | 2 | 3 | 4 | 5    | 1         | 2 | 3 | 4 | 5    |
| 12. Common sense approach                                                 | 1                            | 2 | 3 | 4 | 5    | 1         | 2 | 3 | 4 | 5    |

|                                                                                     |           |           |
|-------------------------------------------------------------------------------------|-----------|-----------|
| <b>13. Anticipation of deteriorating patient</b>                                    | 1 2 3 4 5 | 1 2 3 4 5 |
| <b>14. Being non-judgemental</b>                                                    | 1 2 3 4 5 | 1 2 3 4 5 |
| <b>15. Humility</b>                                                                 | 1 2 3 4 5 | 1 2 3 4 5 |
| <b>16. Having up to date knowledge/training</b>                                     | 1 2 3 4 5 | 1 2 3 4 5 |
| <b>17. Taking an appropriate history and examination</b>                            | 1 2 3 4 5 | 1 2 3 4 5 |
| <b>18. Having good technical skills</b>                                             | 1 2 3 4 5 | 1 2 3 4 5 |
| <b>19. Clear and effective communication</b>                                        | 1 2 3 4 5 | 1 2 3 4 5 |
| <b>20. Know who, when, how to call for help appropriately</b>                       | 1 2 3 4 5 | 1 2 3 4 5 |
| <b>21. Ability to work well in a team</b>                                           | 1 2 3 4 5 | 1 2 3 4 5 |
| <b>22. Continuous questioning of self and others</b>                                | 1 2 3 4 5 | 1 2 3 4 5 |
| <b>23. Having an appropriate level of confidence (not over- or under-confident)</b> | 1 2 3 4 5 | 1 2 3 4 5 |
| <b>24. Having good leadership skills</b>                                            | 1 2 3 4 5 | 1 2 3 4 5 |
| <b>25. Responding to change in circumstances</b>                                    | 1 2 3 4 5 | 1 2 3 4 5 |
| <b>26. Being able to speak up about error</b>                                       | 1 2 3 4 5 | 1 2 3 4 5 |
| <b>27. Being open about error</b>                                                   | 1 2 3 4 5 | 1 2 3 4 5 |
| <b>28. Not letting one's own personal issues interfere with patient care</b>        | 1 2 3 4 5 | 1 2 3 4 5 |
| <b>29. Being courteous and considerate</b>                                          | 1 2 3 4 5 | 1 2 3 4 5 |
| <b>30. Acting decisively in a crisis</b>                                            | 1 2 3 4 5 | 1 2 3 4 5 |
| <b>31. Delegating appropriately</b>                                                 | 1 2 3 4 5 | 1 2 3 4 5 |
| <b>32. Being receptive to others in the team</b>                                    | 1 2 3 4 5 | 1 2 3 4 5 |
| <b>33. Willingness to listen/take advice</b>                                        | 1 2 3 4 5 | 1 2 3 4 5 |
| <b>34. Alertness/ being 'on the ball'</b>                                           | 1 2 3 4 5 | 1 2 3 4 5 |

|                                                                                      |           |           |
|--------------------------------------------------------------------------------------|-----------|-----------|
| <b>35. Managing risk appropriately</b>                                               | 1 2 3 4 5 | 1 2 3 4 5 |
| <b>36. Organisational skills/efficiency</b>                                          | 1 2 3 4 5 | 1 2 3 4 5 |
| <b>37. Checking and re-checking in error-prone situations</b>                        | 1 2 3 4 5 | 1 2 3 4 5 |
| <b>38. Being available &amp; perceived as available</b>                              | 1 2 3 4 5 | 1 2 3 4 5 |
| <b>39. Giving constructive feedback</b>                                              | 1 2 3 4 5 | 1 2 3 4 5 |
| <b>40. Allowing others to take over where appropriate</b>                            | 1 2 3 4 5 | 1 2 3 4 5 |
| <b>41. Being able to minimise distractions in the clinical environment</b>           | 1 2 3 4 5 | 1 2 3 4 5 |
| <b>42. Being able to follow instructions where appropriate</b>                       | 1 2 3 4 5 | 1 2 3 4 5 |
| <b>43. Having a sense of ‘togetherness’ within the team</b>                          | 1 2 3 4 5 | 1 2 3 4 5 |
| <b>44. Being thorough/paying attention to detail</b>                                 | 1 2 3 4 5 | 1 2 3 4 5 |
| <b>45. Gathering information adequately and competently</b>                          | 1 2 3 4 5 | 1 2 3 4 5 |
| <b>46. Conscientiousness</b>                                                         | 1 2 3 4 5 | 1 2 3 4 5 |
| <b>47. Prioritisation/multi tasking</b>                                              | 1 2 3 4 5 | 1 2 3 4 5 |
| <b>48. Acting appropriately if hazards are noticed</b>                               | 1 2 3 4 5 | 1 2 3 4 5 |
| <b>49. Contingency planning with clearly defined levels of care (safety-netting)</b> | 1 2 3 4 5 | 1 2 3 4 5 |
| <b>50. Regularly re-reviewing the situation</b>                                      | 1 2 3 4 5 | 1 2 3 4 5 |
| <b>51. Having &amp; attending frequent/regular team meetings</b>                     | 1 2 3 4 5 | 1 2 3 4 5 |
| <b>52. Caring about the patient</b>                                                  | 1 2 3 4 5 | 1 2 3 4 5 |
| <b>53. Empathy</b>                                                                   | 1 2 3 4 5 | 1 2 3 4 5 |
| <b>54. Not becoming frustrated with patients one cannot solve</b>                    | 1 2 3 4 5 | 1 2 3 4 5 |
| <b>55. Not thinking of re-attenders as a nuisance</b>                                | 1 2 3 4 5 | 1 2 3 4 5 |
| <b>56. Thinking “how am I today?” (tiredness, stress, etc)</b>                       | 1 2 3 4 5 | 1 2 3 4 5 |

|                                                       |           |           |
|-------------------------------------------------------|-----------|-----------|
| 57. Being confident in decision-making                | 1 2 3 4 5 | 1 2 3 4 5 |
| 58. Changing one's behaviour in response to tiredness | 1 2 3 4 5 | 1 2 3 4 5 |
| 59. Being aware of unsafe members in the team         | 1 2 3 4 5 | 1 2 3 4 5 |
| 60. Being aware of others around you                  | 1 2 3 4 5 | 1 2 3 4 5 |
| 61. Recognising a sick patient                        | 1 2 3 4 5 | 1 2 3 4 5 |
| 62. Having appropriate diagnostic skills              | 1 2 3 4 5 | 1 2 3 4 5 |
| 63. Managing overconfident/blasé juniors              | 1 2 3 4 5 | 1 2 3 4 5 |
| 64. Learning from previous mistakes                   | 1 2 3 4 5 | 1 2 3 4 5 |
| 65. Team back-up behaviours (supporting others)       | 1 2 3 4 5 | 1 2 3 4 5 |
| 66. Preparedness                                      | 1 2 3 4 5 | 1 2 3 4 5 |

**Finally, please state if there are any other safety skills that you feel are missing from this list.**

For each skill you mention, please also rate its importance/relevance to being a safe GP and its trainability

**OTHER SAFETY SKILLS NOT MENTIONED ABOVE (continue on separate page if necessary)**

- 1.
- 2.
- 3.
- 4.
- 5.
